# Supplementary material for: Band alignment of Pb–Sn mixed triple cation perovskites for inverted solar cells with negligible hysteresis
Source: Royal Society of Chemistry journal article supplement (doi:10.1039/c8ta11891d), 2019-01-01
Supplement: c8ta11891d1.pdf [file c8ta11891d1.pdf]

## Supporting Information

### **Band alignment of Pb-Sn mixed triple cation perovskites for inverted solar cells with negligible hysteresis**

*Long Ji,<sup>a</sup> Xiangzhao Zhang,<sup>b</sup> Ting Zhang,<sup>a</sup> Yafei Wang,<sup>a</sup> Feng Wang,<sup>a</sup> Zhiqing Zhong,<sup>a</sup> Zhi David Chen,<sup>c</sup> Zewen Xiao,<sup>d,\*</sup> Li Chen,<sup>a</sup> and Shibin Li<sup>a,\*</sup>*

<sup>a</sup>State Key Laboratory of Electronic Thin Films and Integrated Devices, and School of Optoelectronic Science and Engineering, University of Electronic Science and Technology of China (UESTC), Chengdu, Sichuan 610054, China

<sup>b</sup>School of materials Science and Engineering, Jiangsu University, Zhenjiang 212013, China

<sup>c</sup>Department of Electrical & Computer Engineering and Center for Nanoscale Science & Engineering, University of Kentucky, Lexington, Kentucky 40506, USA

<sup>d</sup>Wuhan National Laboratory for Optoelectronics, Huazhong University of Science and Technology, Wuhan 430074, China

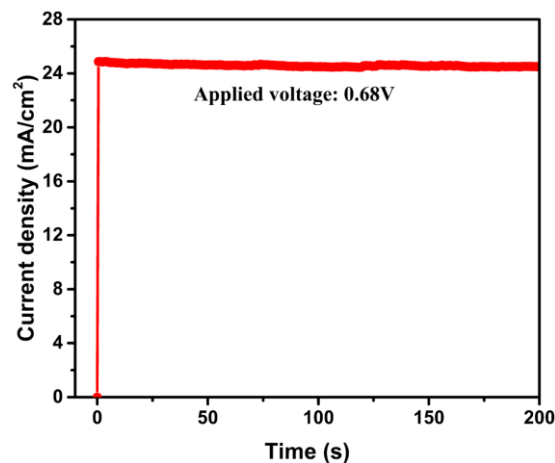

Figure S1. The steady-state photocurrent output of the  $\text{Cs}_{0.05}\text{FA}_{0.79}\text{MA}_{0.16}\text{Pb}_{1-x}\text{Sn}_x\text{X}_3$  ( $x = 0.336$ ) PSCs with an applied voltage of 0.68 V at the maximum power point.

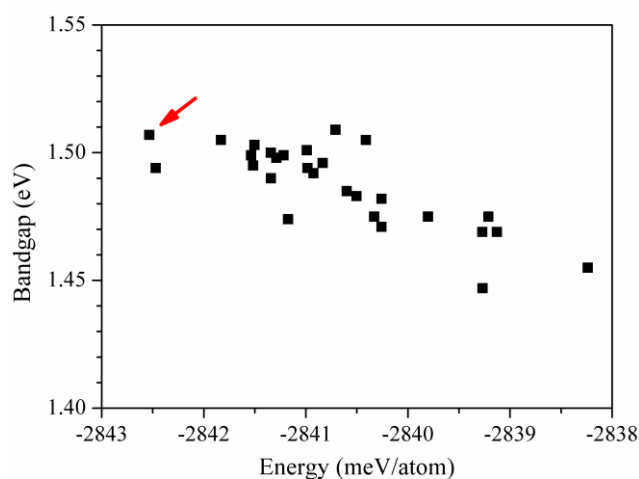

Figure S2. Calculated bandgaps and total energies of  $\text{FrPbI}_{2.48}\text{Br}_{0.52}$  with different I/Br configurations. The one marked by red arrow indicate the I/Br configuration that has the lowest energy and a reasonable bandgap of 1.51 eV, which was considered as the ground-state I/Br configuration for all calculations.

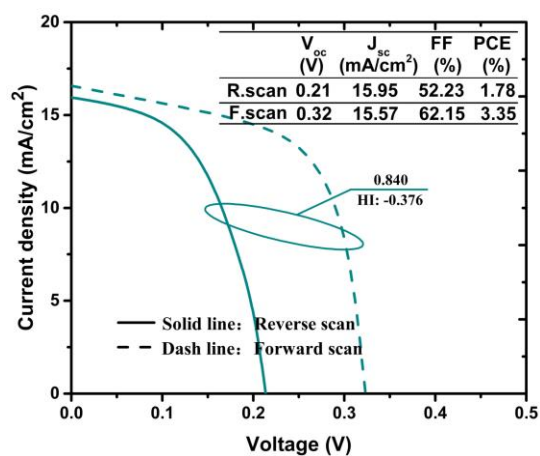

Figure S3.  $J$ - $V$  curves of  $\text{Cs}_{0.05}\text{FA}_{0.79}\text{MA}_{0.16}\text{Pb}_{1-x}\text{Sn}_x\text{X}_3$  ( $x = 0.840$ ) perovskite as light absorbing layer.

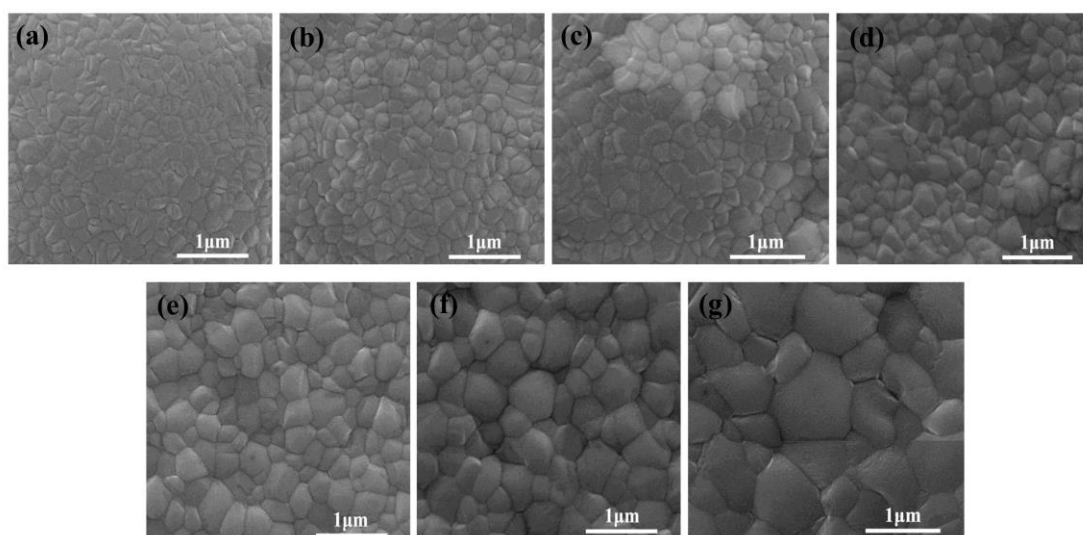

Figure S4. Top-view SEM images of  $\text{Cs}_{0.05}\text{FA}_{0.79}\text{MA}_{0.16}\text{Pb}_{1-x}\text{Sn}_x\text{X}_3$  perovskite films deposited on PEDOT:PSS with different  $\text{SnI}_2$  concentration: a)  $x = 0.000$ , b)  $x = 0.084$ , c)  $x = 0.168$ , d)  $x = 0.252$ , e)  $x = 0.336$ , f)  $x = 0.420$ , g)  $x = 0.840$ .

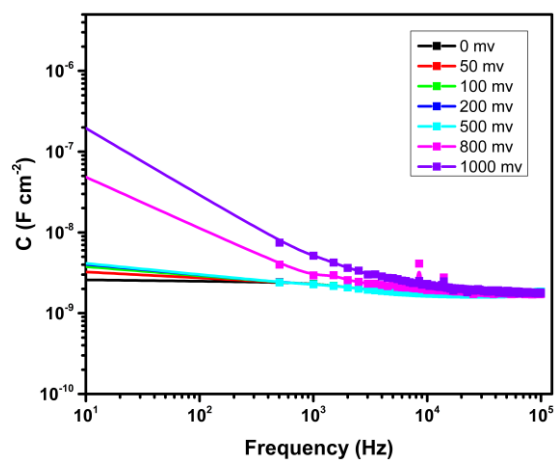

Figure S5. Dark capacitance curve of champion device ( $x = 0.336$ ) under different bias voltages.

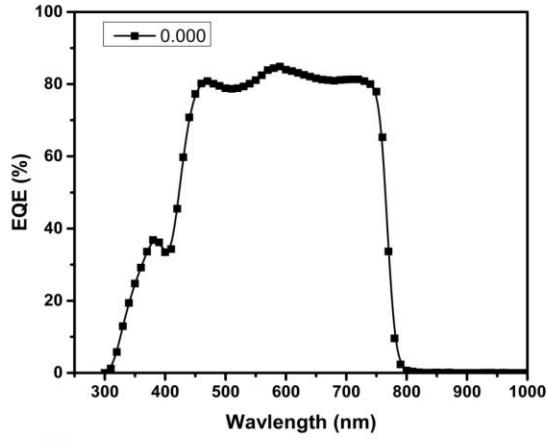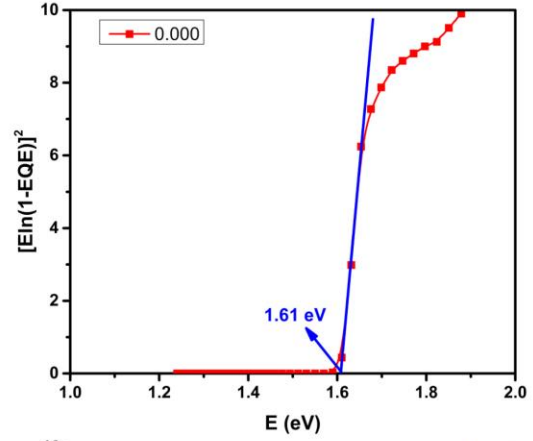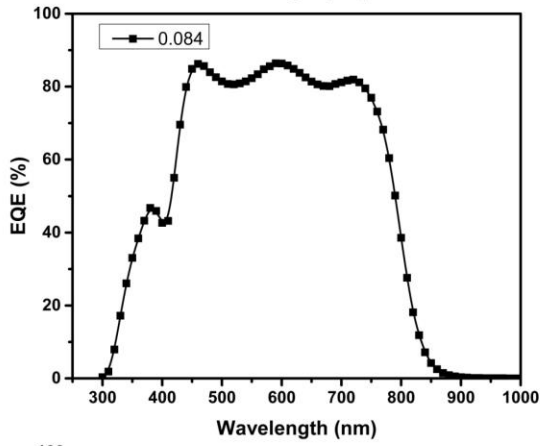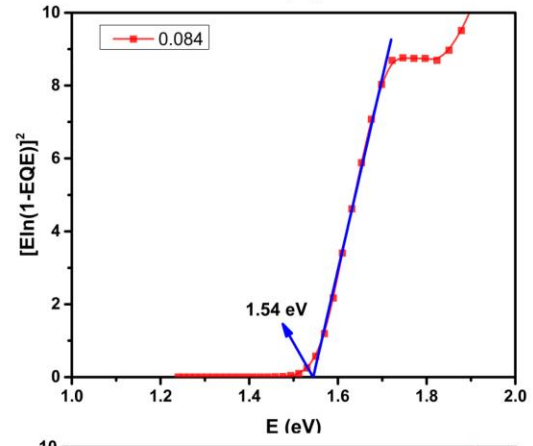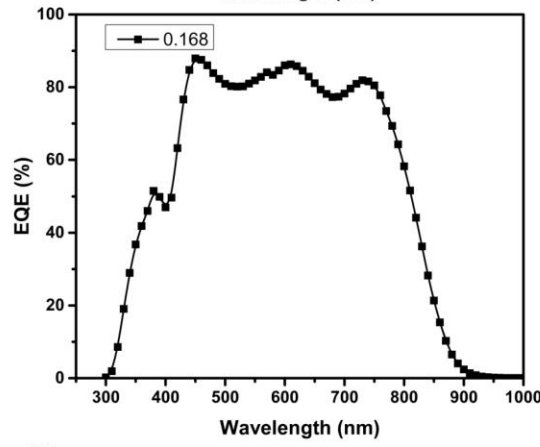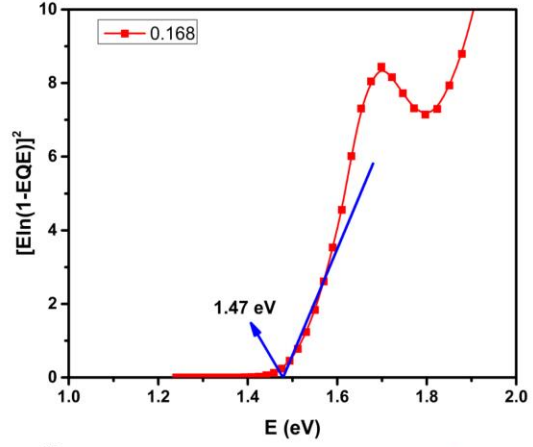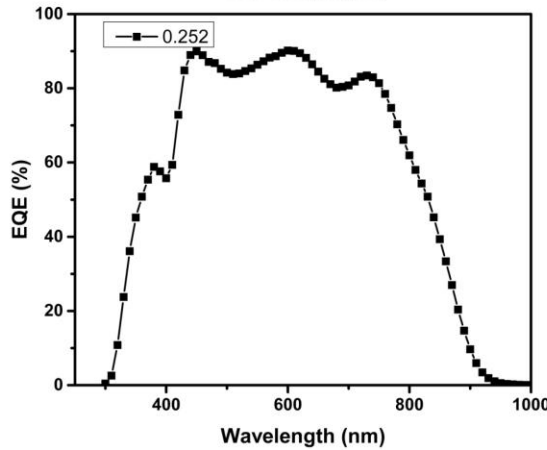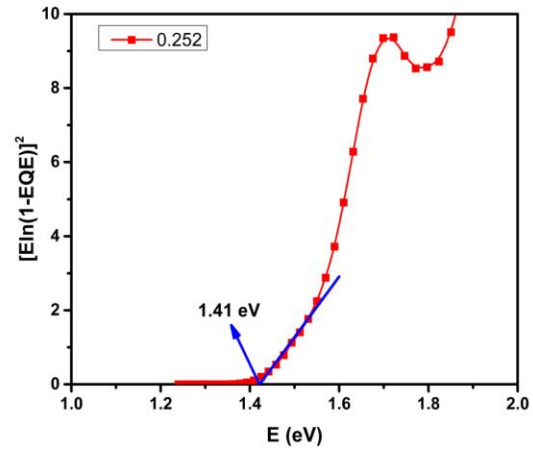

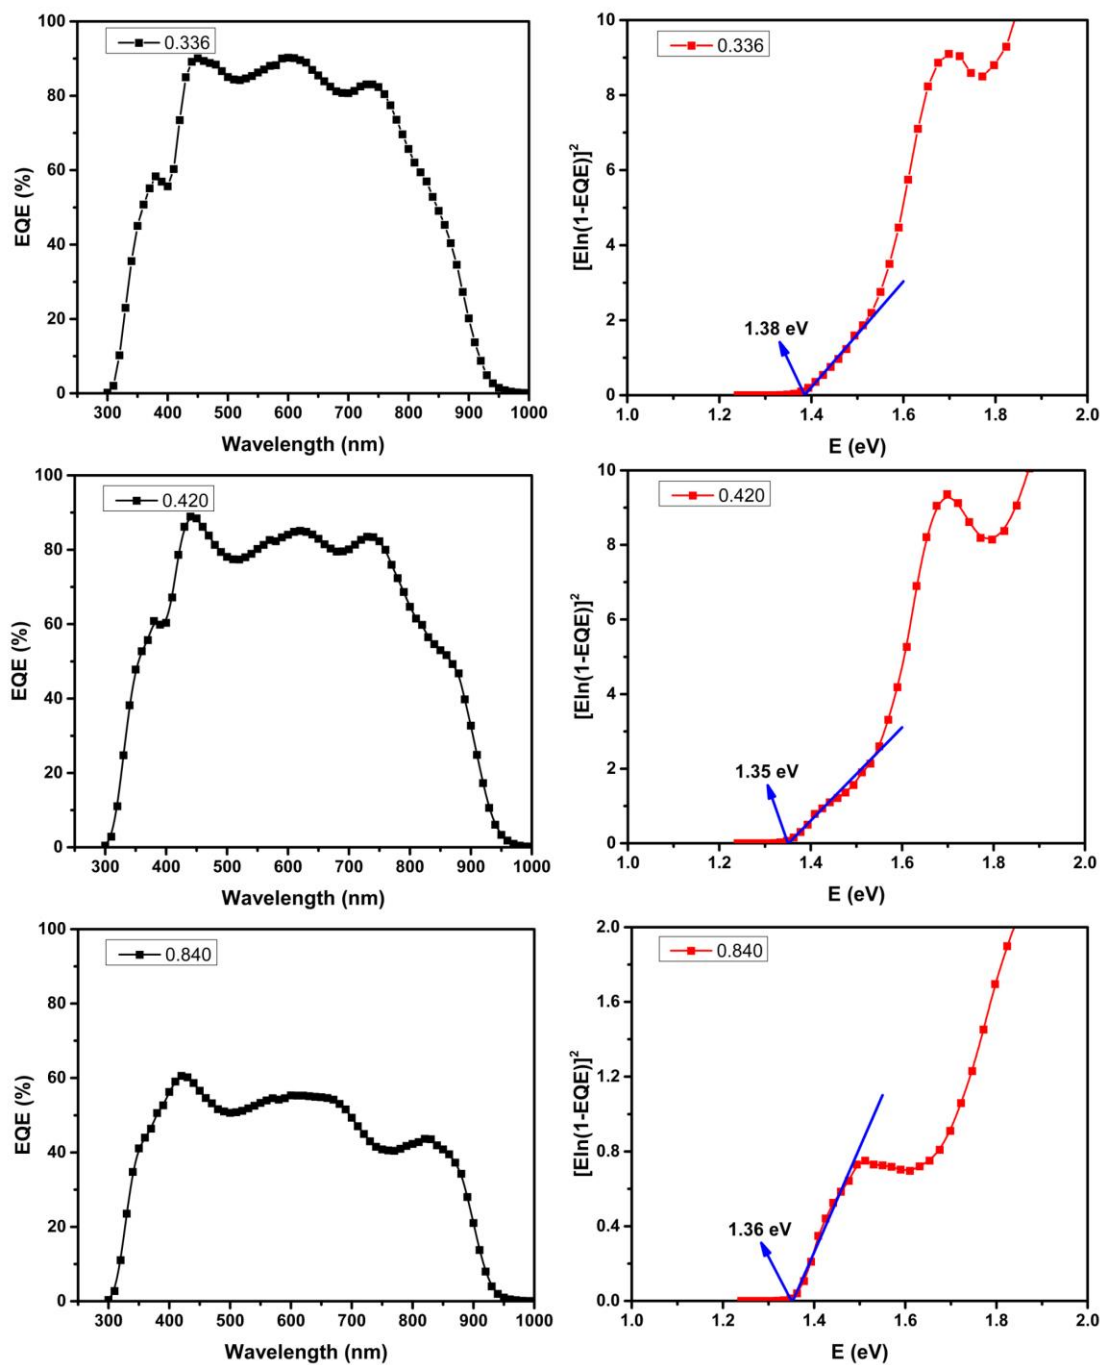

Figure S6. EQE spectra and plots of  $[E \times (1 - EQE)]^2$  against  $E$  of  $\text{Cs}_{0.05}\text{FA}_{0.79}\text{MA}_{0.16}\text{Pb}_{1-x}\text{Sn}_x\text{X}_3$  perovskite layers.

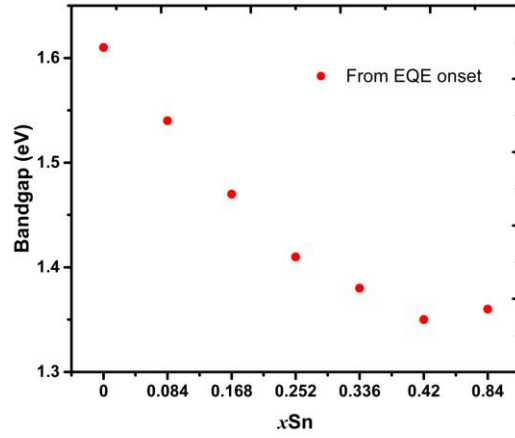

Figure S7. The bandgap values calculated from the onset of the EQE for  $\text{Cs}_{0.05}\text{FA}_{0.79}\text{MA}_{0.16}\text{Pb}_{1-x}\text{Sn}_x\text{X}_3$  with increasing Sn contents.

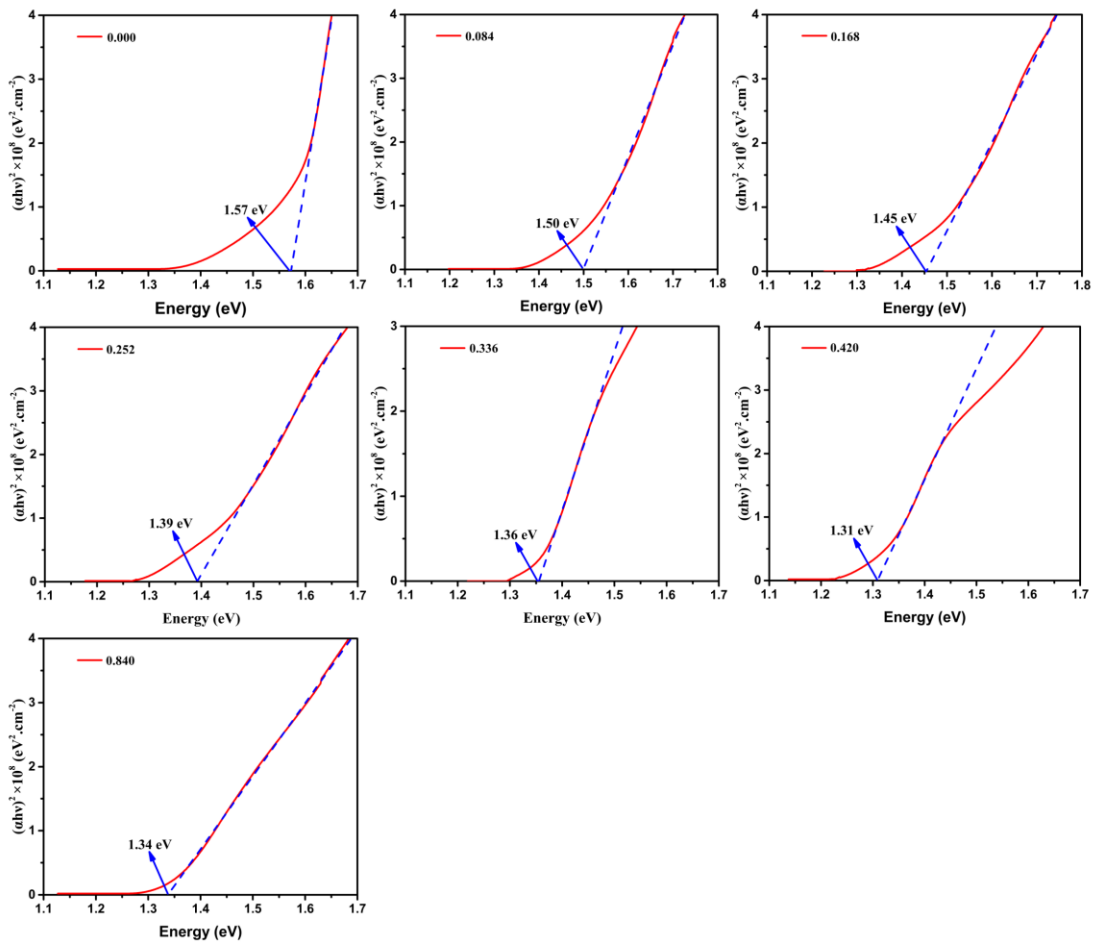

Figure S8. Tauc plots of  $\text{Cs}_{0.05}\text{FA}_{0.79}\text{MA}_{0.16}\text{Pb}_{1-x}\text{Sn}_x\text{X}_3$  perovskite layers (The slightly calculated bandgap errors are derived from fitting).

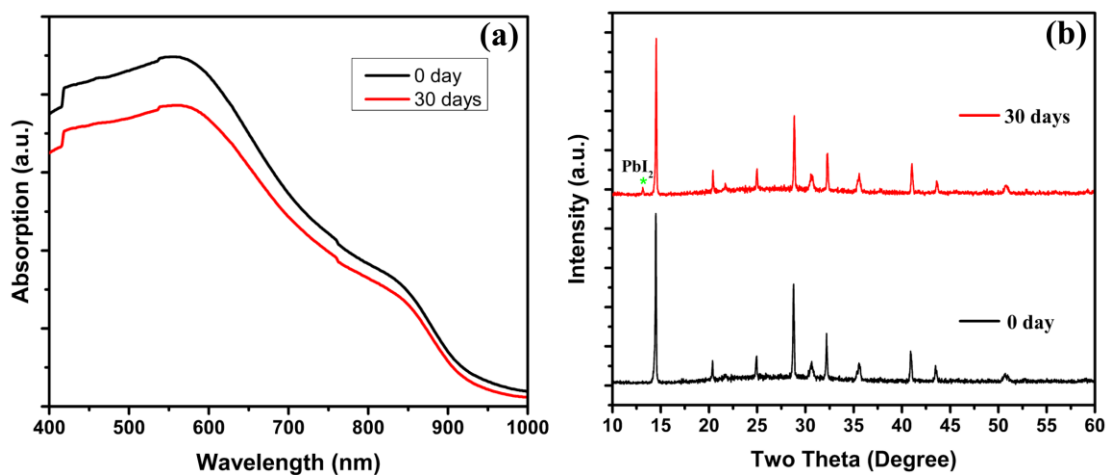

Figure S9. a) Evolution of the absorption spectrum of  $x = 0.336$  samples before and after aging for 30 days in ambient air. b) XRD patterns of  $x = 0.336$  samples before and after aging for 30 days in ambient air.

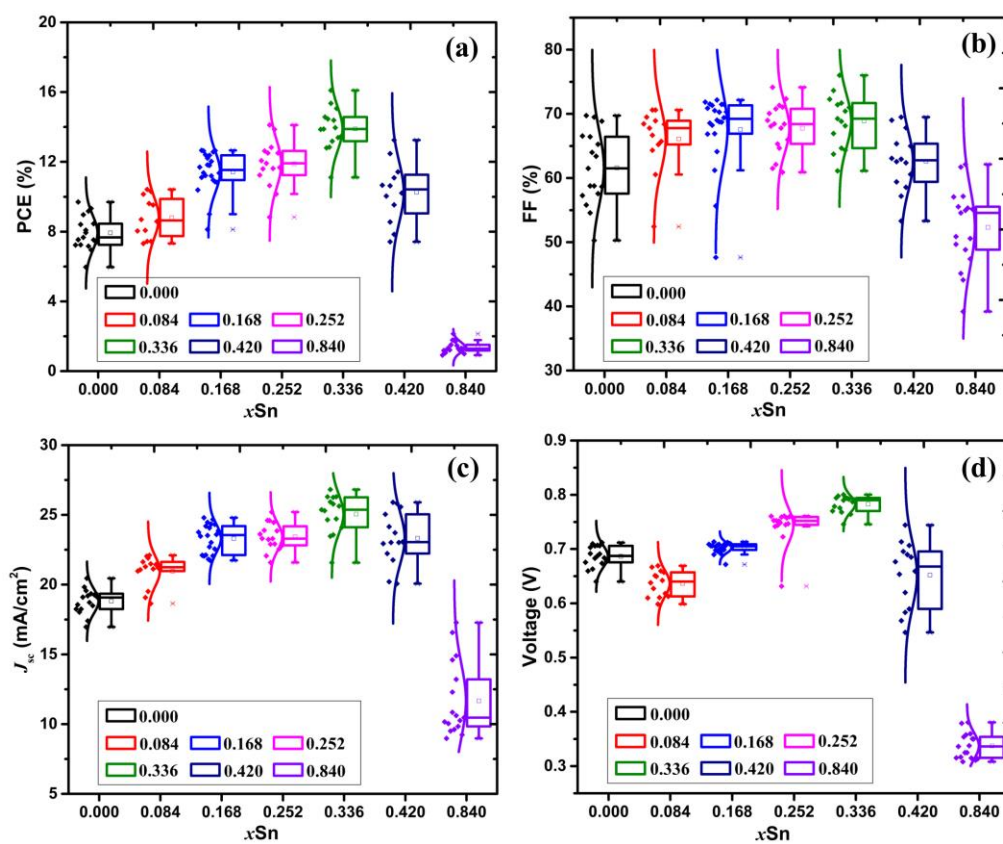

Figure S10. a)-d) Statistical distributions of  $V_{oc}$ ,  $J_{sc}$ , FF and PCE of  $Cs_{0.05}FA_{0.79}MA_{0.16}Pb_{1-x}Sn_xX_3$  PSCs.



Table S1 Photovoltaic parameters of  $\text{Cs}_{0.05}\text{FA}_{0.79}\text{MA}_{0.16}\text{Pb}_{1-x}\text{Sn}_x\text{X}_3$  PSCs under different voltage scans.

| Different contents of $x$ | Scan direction | $V_{oc}$ (V) | $J_{sc}$ (mA/cm <sup>2</sup> ) | FF (%) | PCE (%) |
|---------------------------|----------------|--------------|--------------------------------|--------|---------|
| 0.000                     | Reverse        | 0.70         | 19.82                          | 69.75  | 9.69    |
|                           | Forward        | 0.70         | 19.80                          | 52.03  | 7.21    |
| 0.084                     | Reverse        | 0.67         | 22.10                          | 70.31  | 10.41   |
|                           | Forward        | 0.66         | 21.72                          | 62.02  | 8.87    |
| 0.168                     | Reverse        | 0.71         | 24.79                          | 72.18  | 12.65   |
|                           | Forward        | 0.70         | 24.38                          | 66.24  | 11.27   |
| 0.252                     | Reverse        | 0.76         | 25.20                          | 74.15  | 14.11   |
|                           | Forward        | 0.75         | 24.92                          | 70.09  | 12.98   |
| 0.336                     | Reverse        | 0.80         | 26.59                          | 76.01  | 16.10   |
|                           | Forward        | 0.79         | 26.45                          | 75.45  | 15.76   |
| 0.420                     | Reverse        | 0.74         | 25.90                          | 69.51  | 13.25   |
|                           | Forward        | 0.72         | 25.73                          | 65.45  | 12.10   |
| 0.840                     | Reverse        | 0.21         | 15.95                          | 52.23  | 1.78    |
|                           | Forward        | 0.32         | 15.57                          | 62.15  | 3.35    |

Table S2. The measured  $J_{sc}$  of  $\text{Cs}_{0.05}\text{FA}_{0.79}\text{MA}_{0.16}\text{Pb}_{1-x}\text{Sn}_x\text{X}_3$  PSCs from  $J-V$  curves and the corresponding integrated  $J_{sc}$  from EQE spectra.

| Different contents of $x$                 | 0.000 | 0.084 | 0.168 | 0.252 | 0.336 | 0.420 | 0.840 |
|-------------------------------------------|-------|-------|-------|-------|-------|-------|-------|
| I-V $J_{sc}$ (mA/cm <sup>2</sup> )        | 19.82 | 22.10 | 24.79 | 25.20 | 26.59 | 25.90 | 15.95 |
| Integrated $J_{sc}$ (mA/cm <sup>2</sup> ) | 19.02 | 21.67 | 24.32 | 24.96 | 26.19 | 25.21 | 15.30 |

Table S3. Photogenerated carrier lifetime and detection wavelength of  $\text{Cs}_{0.05}\text{FA}_{0.79}\text{MA}_{0.16}\text{Pb}_{1-x}\text{Sn}_x\text{X}_3$  perovskites. Carrier lifetime is calculated by using double-exponential fit.

| Different contents of $x$ | 0.000 | 0.252 | 0.336 | 0.420 |
|---------------------------|-------|-------|-------|-------|
| Detection wavelength (nm) | 760   | 840   | 850   | 855   |
| Carrier life time (ns)    | 25.37 | 9.08  | 6.82  | 2.75  |
